# Supplementary material for: Genome-wide Identification and Expression Analysis of the Cucumber PP2C Genes Family
Source: Research Square preprint supplement (doi:10.21203/rs.3.rs-1133107/v1), 2021-12-13
Supplement: Supplementary file 1 [file 34c364061105cd201c9192d1.xlsx]

## Sheet: ct value
CK		6H	ABA	PEG	NaCl	cold		12H	ABA	PEG	NaCl	cold		24H	ABA	PEG	NaCl	cold
21.2002		PP2C2	24.12	25.3679	22.6743	26.1597		PP2C2	24.1061	27.902	25.5907	28.8433		PP2C2	21.979	23.6004	25.989	27.909
21.2021		PP2C2	24.3976	25.8094	22.288	27.3009		PP2C2	24.1606	23.2634	25.543	27.15		PP2C2	22.097	23.3522	25.6287	27.7604
22.6216		PP2C2	24.6601	25.8744	22.6111	27.3978		PP2C2	24.2081	24.5444	26.0254	25.6469		PP2C2	22.2811	23.5157	25.753	24.9869
26.5237		PP2C3	25.3191	26.9739	23.6466	26.8481		PP2C3	25.8815	25.9807	26.7236	28.9455		PP2C3	23.366	24.6685	27.2049	29.093
25.7689		PP2C3	26.3783	26.9863	23.6178	26.566		PP2C3	25.6556	24.9801	26.5413	29.0689		PP2C3	23.5517	24.6601	26.9541	29.2604
26.3519		PP2C3	26.1873	26.9272	23.5568	28.1289		PP2C3	25.9622	24.9684	26.7239	29.4216		PP2C3	23.401	24.6222	27.0474	29.3623
23.4736		PP2C4	25.4975	26.8953	24.9626	24.7859		PP2C4	26.9834	25.8603	29.0899	27.8877		PP2C4	26.3272	24.9015	28.5284	27.0406
22.4017		PP2C4	25.6544	26.8244	24.5285	24.8326		PP2C4	27.1283	25.7012	30.6385	28.2016		PP2C4	26.1711	24.978	28.2211	26.958
23.7635		PP2C4	26.0078	26.8451	24.7873	24.7662		PP2C4	26.659	25.8092	28.181	27.5497		PP2C4	26.0207	24.7965	28.5518	26.7712
26.6208		PP2C5	28.3322	29.5902	30.767	26.526		PP2C5	31.3926	28.5727	32.3937	28.414		PP2C5	32.9587	29.0727	33.4961	28.9785
25.0294		PP2C5	29.3875	29.2672	30.767	27.5026		PP2C5	31.8508	28.0427	33.4098	28.0727		PP2C5	35.2132	30.1757	32.8855	28.4707
25.22		PP2C5	28.8748	29.3712	31.067	26.6249		PP2C5	32.1629	29.1727	33.1352	28.5794		PP2C5	32.9909	29.4727	32.5673	29.0171
25.9617		PP2C15	26.5416	27.6919	25.5797	27.668		PP2C15	27.1634	28.458	28.9146	29.842		PP2C15	26.2748	23.9602	28.4195	29.3881
26.1707		PP2C15	26.6116	27.4346	25.5068	27.9092		PP2C15	27.1269	28.6679	28.8574	29.8206		PP2C15	26.1754	25.6154	28.7196	28.9255
25.9053		PP2C15	26.2906	27.6229	25.4109	27.576		PP2C15	27.2756	29.008	28.3768	30.7135		PP2C15	26.0796	25.4412	28.1215	29.1812
25.6505		PP2C18	28.8976	31.1141	26.9256	26.3115		PP2C18	28.7315	32.3993	28.4087	29.7617		PP2C18	29.6368	30.7598	27.8145	32.0505
24.8051		PP2C18	28.5992	33.2888	27.2052	26.759		PP2C18	28.9238	31.073	28.0085	29.8317		PP2C18	29.8341	32.2512	27.7956	30.656
25.9531		PP2C18	28.0853	31.3774	27.0594	27.6659		PP2C18	28.7147	31.3914	28.1285	28.9117		PP2C18	29.5591	32.2299	27.1526	32.0307
25.565		PP2C19	26.2408	27.5493	26.2526	26.6765		PP2C19	28.7724	26.2257	29.4366	29.0021		PP2C19	27.4972	25.952	29.2773	30.9577
25.3759		PP2C19	26.2509	27.5653	26.2107	26.6268		PP2C19	28.7788	26.6752	29.9266	28.9259		PP2C19	27.2685	25.7195	29.3739	30.6388
25.6276		PP2C19	26.187	27.9282	26.2077	26.8831		PP2C19	28.5787	26.5772	29.4374	28.9329		PP2C19	27.1831	25.416	29.2164	31.3469
25.227		PP2C22	26.9004	28.0583	25.6365	26.4601		PP2C22	30.1283	29.0621	31.6922	29.1479		PP2C22	25.0082	24.4863	25.5289	27.951
25.3696		PP2C22	26.9503	28.0481	26.3154	26.5061		PP2C22	30.5192	29.6822	31.9823	29.1565		PP2C22	24.8524	24.8301	25.7397	27.9872
25.0908		PP2C22	26.6241	28.1907	26.2346	27.0306		PP2C22	30.8887	28.5486	31.9775	28.9748		PP2C22	24.7292	25.3012	25.9228	28.3024
24.0851		PP2C28	27.3453	27.6487	24.9028	25.6958		PP2C28	26.9125	26.3762	26.7351	26.3365		PP2C28	26.3519	25.3962	27.3384	25.026
24.1783		PP2C28	27.0492	27.6688	24.7861	26.6888		PP2C28	26.5759	26.4614	26.8514	26.535		PP2C28	25.6581	24.9102	27.2669	24.9818
24.0619		PP2C28	26.8212	27.7885	25.0794	25.8984		PP2C28	26.8487	26.6269	27.1544	26.8786		PP2C28	25.7692	25.0644	27.2271	25.5562
26.1883		PP2C39	28.5156	28.3293	27.9406	30.0228		PP2C39	28.2875	26.8361	30.5642	29.4973		PP2C39	25.9804	25.6707	30.1911	28.4205
25.8782		PP2C39	28.4663	28.3922	27.9561	30.0464		PP2C39	29.0468	26.9366	30.9893	30.2732		PP2C39	25.9782	25.6776	30.3924	28.278
25.1415		PP2C39	29.0355	28.566	28.0177	27.5464		PP2C39	28.5628	26.8455	31.3692	30.0751		PP2C39	25.9821	25.9006	30.1577	28.4063
27.3236		PP2C40	29.0533	29.2511	28.7805	29.701		PP2C40	29.072	27.3614	30.6245	31.029		PP2C40	27.2563	27.2815	29.6284	28.4568
26.7144		PP2C40	29.5284	29.5663	29.114	29.5848		PP2C40	28.7325	27.4119	31.4537	30.5485		PP2C40	27.6172	27.3726	29.853	28.5204
26.1827		PP2C40	29.3797	29.7967	29.1704	29.1137		PP2C40	30.3009	27.6661	30.6363	30.2883		PP2C40	27.5463	27.4456	30.1698	28.9261
25.1827		PP2C52	29.1163	30.4333	28.4298	27.9251		PP2C52	30.467	28.6698	31.4899	29.1956		PP2C52	28.4851	28.6242	31.1931	28.926
25.9789		PP2C52	29.3371	29.6802	28.5315	27.9646		PP2C52	30.4113	28.6292	31.8462	29.8277		PP2C52	28.4257	28.0141	30.7485	28.8127
26.2357		PP2C52	29.8497	29.9486	28.8925	27.9451		PP2C52	30.2604	28.7272	31.6695	29.6733		PP2C52	28.3841	27.8976	30.6598	29.0794
21.772		ACT	24.9588	25.1557	24.2851	24.5568		ACT	25.9368	23.9868	26.7125	25.6409		ACT	23.2842	22.9672	25.8858	23.5318
21.9627		ACT	25.1279	25.3049	24.1834	24.6138		ACT	25.6263	24.0565	26.7402	25.9192		ACT	23.4814	23.0287	25.9728	23.5592
21.7738		ACT	25.1224	25.0467	23.9444	24.7192		ACT	25.3328	24.0886	26.6252	26.1085		ACT	23.3989	23.1263	25.8565	23.7759

## Sheet: Calculated value
PP2C2						CK								PP2C3						CK								PP2C4						CK								PP2C5						CK
6h	ct value	act value	act average	ΔCT value		ct value	act value	act average	ct-act average	average	-ΔΔCT value	2-ΔΔCT value		6h	ct value	act value	act average	ΔCT value		ct value	act value	act average	ct-act average	average	-ΔΔCT value	2-ΔΔCT value		6h	ct value	act value	act average	ΔCT value		ct value	act value	act average	ct-act average	average	-ΔΔCT value	2-ΔΔCT value		6h	ct value	act value	act average	ΔCT value		ct value	act value
	24.12	24.9588		-0.950007		21.2002	21.772		-0.762803		0.190007	1.14077			25.3191	24.9588		0.249075		26.5237	21.772		4.56072		4.00093	16.0103			25.4975	24.9588		0.427488		23.4736	21.772		1.51056		0.822512	1.76848			28.3322	24.9588		3.26216		26.6208	21.772
ABA	24.3976	25.1279	25.0697	-0.672438		21.2021	21.9627	21.9627	-0.760887	-0.760887	-0.087562	0.941112		ABA	26.3783	25.1279	25.0697	1.30827		25.7689	21.9627	21.9627	3.80591	4.25185	2.94173	7.68334		ABA	25.6544	25.1279	25.0697	0.584383		22.4017	21.9627	21.9627	0.43872	1.24994	0.665617	1.58625		ABA	29.3875	25.1279	25.0697	4.31748		25.2294	21.9627
	24.6601	25.1224		-0.409924		22.6216	21.7738		0.658626		-0.350076	0.784543			26.1873	25.1224		1.11733		26.3519	21.7738		4.38893		3.13267	8.77056			26.0078	25.1224		0.937771		23.7635	21.7738		1.80055		0.312229	1.24162			28.8748	25.1224		3.80479		25.22	21.7738
	25.3679	25.1557		0.297916							-1.05792	0.480325			26.9739	25.1557		1.80489							2.44511	5.44567			26.8953	25.1557		1.7263							-0.476302	0.718818			29.5902	25.1557		4.42122
PEG	25.8094	25.3049	25.1691	0.739423							-1.49942	0.353695		PEG	26.9863	25.3049	25.1691	1.81728							2.43272	5.39909		PEG	26.8244	25.3049	25.1691	1.65541							-0.405409	0.755022		PEG	29.2672	25.3049	25.1691	4.09824
	25.8744	25.0467		0.804439							-1.56444	0.338109			26.9272	25.0467		1.7582							2.4918	5.62479			26.8451	25.0467		1.67611							-0.426108	0.744267			29.3712	25.0467		4.2022
	22.6743	24.2851		-2.39572							1.63572	3.10743			23.6466	24.2851		-0.49138							4.74138	26.7484			24.9626	24.2851		0.824631							0.425369	1.34292			30.767	24.2851		6.62903
NaCl	22.288	24.1834	24.1376	-2.78201							2.02201	4.06149		NaCl	23.6178	24.1834	24.1376	-0.520244							4.77024	27.2889		NaCl	24.5285	24.1834	24.1376	0.390477							0.859523	1.81444		NaCl	30.767	24.1834	24.1376	6.62903
	22.6111	23.9444		-2.4589							1.6989	3.24653			23.5568	23.9444		-0.581249							4.83125	28.4676			24.7873	23.9444		0.64926							0.60074	1.51649			31.067	23.9444		6.92903
	26.1597	24.5568		1.08971							-1.84971	0.277449			26.8481	24.5568		2.21815							2.03185	4.0893			24.7859	24.5568		0.155858							1.09414	2.13486			26.526	24.5568		1.89602
Cold	27.3009	24.6138	24.6299	2.23085							-2.99085	0.125795		Cold	26.566	24.6138	24.6299	1.93602							2.31398	4.97251		Cold	24.8326	24.6138	24.6299	0.202626							1.04737	2.06676		Cold	27.5026	24.6138	24.6299	2.87261
	27.3978	24.7192		2.32783							-3.08783	0.117617			28.1289	24.7192		3.49892							0.751082	1.68305			24.7662	24.7192		0.136155							1.11384	2.16422			26.6249	24.7192		1.99494
12h	ct value	act value	act average	ΔCT value		ct value	act value	act average	ct-act average	average	-ΔΔCT value	2-ΔΔCT value		12h	ct value	act value	act average	ΔCT value		ct value	act value	act average	ct-act average	average	-ΔΔCT value	2-ΔΔCT value		12h	ct value	act value	act average	ΔCT value		ct value	act value	act average	ct-act average	average	-ΔΔCT value	2-ΔΔCT value		12h	ct value	act value	act average	ΔCT value		ct value	act value
	24.1061	25.9368		-1.52587		21.2002	21.772		-0.762803		0.765869	1.70039			25.8815	25.9368		0.249474		26.5237	21.772		4.56072		4.00053	16.0058			26.9834	25.9368		1.35144		23.4736	21.772		1.51056		-0.101444	0.932099			31.3926	25.9368		5.76058		26.6208	21.772
ABA	24.1606	25.6263	25.6319	-1.47139		21.2021	21.9627	21.9627	-0.760887	-0.760887	0.711394	1.63739		ABA	25.6556	25.6263	25.6319	0.0235672		25.7689	21.9627	21.9627	3.80591	4.25185	4.22643	18.719		ABA	27.1283	25.6263	25.6319	1.49634		22.4017	21.9627	21.9627	0.43872	1.24994	-0.246336	0.843035		ABA	31.8508	25.6263	25.6319	6.21884		25.2294	21.9627
	24.2081	25.3328		-1.42394		22.6216	21.7738		0.658626		0.663943	1.58441			25.9622	25.3328		0.330223		26.3519	21.7738		4.38893		3.91978	15.1346			26.659	25.3328		1.02705		23.7635	21.7738		1.80055		0.22295	1.16712			32.1629	25.3328		6.53087		25.22	21.7738
	24.902	23.9868		0.858027							-1.61803	0.325781			25.9807	23.9868		1.93671							2.31329	4.97014			25.8603	23.9868		1.81633							-0.566332	0.675332			28.5727	23.9868		4.53268
PEG	23.2634	24.0565	24.044	-0.780559							0.0205589	1.01435		PEG	24.9801	24.0565	24.044	0.936108							3.31389	9.94445		PEG	25.7012	24.0565	24.044	1.65722							-0.40722	0.754075		PEG	28.0427	24.0565	24.044	4.00268
	24.5444	24.0886		0.500416							-1.26042	0.417423			24.9684	24.0886		0.924416							3.32558	10.0254			25.8092	24.0886		1.7652							-0.5152	0.699696			29.1727	24.0886		5.13267
	25.5907	26.7125		-1.10233							0.342328	1.2678			26.7236	26.7125		0.0305947							4.21941	18.6281			29.0899	26.7125		2.39687							-1.14687	0.451603			32.3937	26.7125		5.75472
NaCl	25.543	26.7402	26.6926	-1.14999							0.389987	1.31038		NaCl	26.5413	26.7402	26.6926	-0.151677							4.40168	21.1367		NaCl	30.6385	26.7402	26.6926	3.94553							-2.69553	0.15437		NaCl	33.4098	26.7402	26.6926	6.77079
	26.0254	26.6252		-0.667638							-0.092362	0.937986			26.7239	26.6252		0.030917							4.21908	18.6239			28.181	26.6252		1.48803							-0.238026	0.847904			33.1352	26.6252		6.49624
	28.8433	25.6409		2.95329							-3.71329	0.0762409			28.9455	25.6409		3.05547							1.19453	2.2887			27.8877	25.6409		1.99774							-0.747735	0.595538			28.414	25.6409		2.52399
Cold	27.15	25.9192	25.8895	1.25996							-2.01996	0.246565		Cold	29.0689	25.9192	25.8895	3.17894							1.07106	2.10098		Cold	28.2016	25.9192	25.8895	2.31157							-1.06157	0.47911		Cold	28.0727	25.9192	25.8895	2.18268
	25.6469	26.1085		-0.243062							-0.516938	0.698853			29.4216	26.1085		3.53158							0.718424	1.64538			27.5497	26.1085		1.65967							-0.409669	0.752796			28.5794	26.1085		2.68941
24h	ct value	act value	act average	ΔCT value		ct value	act value	act average	ct-act average	average	-ΔΔCT value	2-ΔΔCT value		24h	ct value	act value	act average	ΔCT value		ct value	act value	act average	ct-act average	average	-ΔΔCT value	2-ΔΔCT value		24h	ct value	act value	act average	ΔCT value		ct value	act value	act average	ct-act average	average	-ΔΔCT value	2-ΔΔCT value		24h	ct value	act value	act average	ΔCT value		ct value	act value
	21.979	23.2842		-1.40899		21.2002	21.772		-0.762803		0.648992	1.56807			23.366	23.2842		-0.0219931		26.5237	21.772		4.56072		5.27199	38.6392			26.3272	23.2842		2.93915		23.4736	21.772		1.51056		-1.68915	0.310109			32.9587	25.9368		7.32672		26.6208	21.772
ABA	22.097	23.4814	23.3882	-1.29101		21.2021	21.9627	21.9627	-0.760887	-0.760887	0.531006	1.44494		ABA	23.5517	23.4814	23.3882	0.16367		25.7689	21.9627	21.9627	3.80591	4.25185	5.08633	33.9733		ABA	26.1711	23.4814	23.3882	2.7831		22.4017	21.9627	21.9627	0.43872	1.24994	-1.5331	0.345533		ABA	35.2132	25.6263	25.6319	9.58122		25.2294	21.9627
	22.2811	23.3989		-1.10685		22.6216	21.7738		0.658626		0.346851	1.27178			23.401	23.3989		0.0129705		26.3519	21.7738		4.38893		5.23703	37.714			26.0207	23.3989		2.63271		23.7635	21.7738		1.80055		-1.38271	0.383497			32.9909	25.3328		7.35889		25.22	21.7738
	23.6004	22.9672		0.559382							-1.31938	0.400707			24.6685	22.9672		1.62751							3.62249	12.3162			24.9015	22.9672		1.86049							-0.610491	0.654974			29.0727	23.9868		5.02868
PEG	23.3522	23.0287	23.0407	0.31119							-1.07119	0.475926		PEG	24.6601	23.0287	23.0407	1.6191							3.6309	12.3882		PEG	24.978	23.0287	23.0407	1.93696							-0.686964	0.621159		PEG	30.1757	24.0565	24.044	6.13168
	23.5157	23.1263		0.47469							-1.23469	0.424934			24.6222	23.1263		1.58122							3.66878	12.7178			24.7965	23.1263		1.75546							-0.505461	0.704435			29.4727	24.0886		5.42868
	25.989	25.8858		0.0840461							-0.844046	0.557079			27.2049	25.8858		1.29992							3.95008	15.4558			28.5284	25.8858		2.62343							-1.37343	0.385974			33.4961	26.7125		6.80308
NaCl	25.6287	25.9728	25.905	-0.276279							-0.483721	0.715131		NaCl	26.9541	25.9728	25.905	1.04913							4.20087	18.3902		NaCl	28.2211	25.9728	25.905	2.31613							-1.06613	0.477599		NaCl	32.8855	26.7402	26.6926	6.19251
	25.753	25.8565		-0.152009							-0.607991	0.65611			27.0474	25.8565		1.14241							4.10759	17.2388			28.5518	25.8565		2.64684							-1.39684	0.379761			32.5673	26.6252		5.87434
	27.909	23.5318		4.28696							-5.04696	0.0302492			29.093	23.5318		5.47103							-0.221029	0.857953			27.0406	23.5318		3.41856							-2.16856	0.222433			28.9785	25.6409		3.08853
Cold	27.7604	23.5592	23.6223	4.13844							-4.89844	0.0335291		Cold	29.2604	23.5592	23.6223	5.63844							-0.388441	0.763955		Cold	26.958	23.5592	23.6223	3.33605							-2.08605	0.235525		Cold	28.4707	25.9192	25.8895	2.58068
	24.9869	23.7759		1.36493							-2.12493	0.229263			29.3623	23.7759		5.74026							-0.490255	0.711899			26.7712	23.7759		3.1492							-1.8992	0.268092			29.0171	26.1085		3.12707
PP2C15						CK								PP2C18						CK								PP2C19						CK								PP2C22						CK
6h	ct value	act value	act average	ΔCT value		ct value	act value	act average	ct-act average	average	-ΔΔCT value	2-ΔΔCT value		6h	ct value	act value	act average	ΔCT value		ct value	act value	act average	ct-act average	average	-ΔΔCT value	2-ΔΔCT value		6h	ct value	act value	act average	ΔCT value		ct value	act value	act average	ct-act average	average	-ΔΔCT value	2-ΔΔCT value		6h	ct value	act value	act average	ΔCT value		ct value	act value
	26.5416	24.9588		1.47158		25.9617	21.772		3.99873		2.57842	5.97285			28.8976	24.9588		3.82762		25.6505	21.772		3.71453		-0.297619	0.813594			26.2408	24.9588		1.17077		25.565	21.772		3.60196		2.38923	5.23876			26.9004	24.9588		1.83043		25.227	21.772
ABA	26.6116	25.1279	25.0697	1.54163		26.1707	21.9627	21.9627	4.2077	4.04958	2.50837	5.68976		ABA	28.5992	25.1279	25.0697	3.52919		24.8051	21.9627	21.9627	2.86911	3.53359	0.000812149	1.00056		ABA	26.2509	25.1279	25.0697	1.18091		25.3759	21.9627	21.9627	3.41295	3.55983	2.37909	5.2021		ABA	26.9503	25.1279	25.0697	1.88033		25.3696	21.9627
	26.2906	25.1224		1.22059		25.9053	21.7738		3.94231		2.82941	7.10781			28.0853	25.1224		3.01535		25.9531	21.7738		4.01713		0.514652	1.42865			26.187	25.1224		1.11698		25.6276	21.7738		3.66459		2.44302	5.43778			26.6241	25.1224		1.55407		25.0908	21.7738
	27.6919	25.1557		2.52291							1.52709	2.88204			31.1141	25.1557		5.94512							-2.41512	0.187489			27.5493	25.1557		2.3803							1.1797	2.26529			28.0583	25.1557		2.89135
PEG	27.4346	25.3049	25.1691	2.26564							1.78436	3.44465		PEG	33.2888	25.3049	25.1691	8.11976							-4.58976	0.0415282		PEG	27.5653	25.3049	25.1691	2.39627							1.16373	2.24036		PEG	28.0481	25.3049	25.1691	2.88116
	27.6229	25.0467		2.45392							1.59608	3.02321			31.3774	25.0467		6.20844							-2.67844	0.15621			27.9282	25.0467		2.7592							0.800798	1.74206			28.1907	25.0467		3.02377
	25.5797	24.2851		1.44174							2.60826	6.09769			26.9256	24.2851		2.78759							0.742413	1.67297			26.2526	24.2851		2.11463							1.44537	2.72333			25.6365	24.2851		1.49854
NaCl	25.5068	24.1834	24.1376	1.36879							2.68121	6.41394		NaCl	27.2052	24.1834	24.1376	3.06718							0.462821	1.37823		NaCl	26.2107	24.1834	24.1376	2.07269							1.48731	2.80365		NaCl	26.3154	24.1834	24.1376	2.17738
	25.4109	23.9444		1.27287							2.77713	6.85487			27.0594	23.9444		2.92141							0.608594	1.52477			26.2077	23.9444		2.06969							1.49031	2.8095			26.2346	23.9444		2.0966
	27.668	24.5568		3.03798							1.01202	2.01674			26.3115	24.5568		1.6815							1.8485	3.60126			26.6765	24.5568		2.04645							1.51355	2.85511			26.4601	24.5568		1.83009
Cold	27.9092	24.6138	24.6299	3.27922							0.770782	1.70619		Cold	26.759	24.6138	24.6299	2.12895							1.40105	2.64093		Cold	26.6268	24.6138	24.6299	1.99675							1.56325	2.95518		Cold	26.5061	24.6138	24.6299	1.87611
	27.576	24.7192		2.94604							1.10396	2.14944			27.6659	24.7192		3.03593							0.494074	1.40842			26.8831	24.7192		2.25309							1.30691	2.47411			27.0306	24.7192		2.40057
12h	ct value	act value	act average	ΔCT value		ct value	act value	act average	ct-act average	average	-ΔΔCT value	2-ΔΔCT value		12h	ct value	act value	act average	ΔCT value		ct value	act value	act average	ct-act average	average	-ΔΔCT value	2-ΔΔCT value		12h	ct value	act value	act average	ΔCT value		ct value	act value	act average	ct-act average	average	-ΔΔCT value	2-ΔΔCT value		12h	ct value	act value	act average	ΔCT value		ct value	act value
	27.1634	25.9368		1.53143		25.9617	21.772		3.99873		2.51857	5.73015			28.7315	25.9368		3.09949		25.6505	21.772		3.71453		0.430515	1.34771			28.7724	25.9368		3.1404		25.565	21.772		3.60196		0.4196	1.33756			30.1283	25.9368		4.49629		25.227	21.772
ABA	27.1269	25.6263	25.6319	1.49485		26.1707	21.9627	21.9627	4.2077	4.04958	2.55515	5.87729		ABA	28.9238	25.6263	25.6319	3.29176		24.8051	21.9627	21.9627	2.86911	3.53359	0.238237	1.17955		ABA	28.7788	25.6263	25.6319	3.14685		25.3759	21.9627	21.9627	3.41295	3.55983	0.413151	1.33159		ABA	30.5192	25.6263	25.6319	4.88723		25.3696	21.9627
	27.2756	25.3328		1.64363		25.9053	21.7738		3.94231		2.40637	5.30141			28.7147	25.3328		3.08268		25.9531	21.7738		4.01713		0.447318	1.3635			28.5787	25.3328		2.9467		25.6276	21.7738		3.66459		0.613301	1.52976			30.8887	25.3328		5.25667		25.0908	21.7738
	28.458	23.9868		4.41396							-0.363962	0.777028			32.3993	23.9868		8.35534							-4.82534	0.0352719			26.2257	23.9868		2.18171							1.37829	2.5996			29.0621	23.9868		5.01806
PEG	28.6679	24.0565	24.044	4.62386							-0.57386	0.671817		PEG	31.073	24.0565	24.044	7.029							-3.499	0.0884498		PEG	26.6752	24.0565	24.044	2.63117							0.928832	1.90373		PEG	29.6822	24.0565	24.044	5.63819
	29.008	24.0886		4.96403							-0.91403	0.530701			31.3914	24.0886		7.34737							-3.81737	0.0709344			26.5772	24.0886		2.53321							1.02679	2.03749			28.5486	24.0886		4.50457
	28.9146	26.7125		2.22162							1.82838	3.55138			28.4087	26.7125		1.7157							1.8143	3.51688			29.4366	26.7125		2.74358							0.816419	1.76103			31.6922	26.7125		4.99917
NaCl	28.8574	26.7402	26.6926	2.16438							1.88562	3.69512		NaCl	28.0085	26.7402	26.6926	1.31548							2.21452	4.64128		NaCl	29.9266	26.7402	26.6926	3.23362							0.32638	1.25386		NaCl	31.9823	26.7402	26.6926	5.28931
	28.3768	26.6252		1.6838							2.3662	5.15582			28.1285	26.6252		1.43548							2.09452	4.27085			29.4374	26.6252		2.74441							0.815586	1.76001			31.9775	26.6252		5.2845
	29.842	25.6409		3.95196							0.0980391	1.07032			29.7617	25.6409		3.87168							-0.341682	0.789121			29.0021	25.6409		3.11207							0.447929	1.36408			29.1479	25.6409		3.25789
Cold	29.8206	25.9192	25.8895	3.93055							0.119447	1.08632		Cold	29.8317	25.9192	25.8895	3.94168							-0.411682	0.751746		Cold	28.9259	25.9192	25.8895	3.03587							0.524125	1.43806		Cold	29.1565	25.9192	25.8895	3.26648
	30.7135	26.1085		4.82355							-0.773547	0.584978			28.9117	26.1085		3.02168							0.508318	1.42239			28.9329	26.1085		3.0429							0.517097	1.43107			28.9748	26.1085		3.08479
24h	ct value	act value	act average	ΔCT value		ct value	act value	act average	ct-act average	average	-ΔΔCT value	2-ΔΔCT value		24h	ct value	act value	act average	ΔCT value		ct value	act value	act average	ct-act average	average	-ΔΔCT value	2-ΔΔCT value		24h	ct value	act value	act average	ΔCT value		ct value	act value	act average	ct-act average	average	-ΔΔCT value	2-ΔΔCT value		24h	ct value	act value	act average	ΔCT value		ct value	act value
	26.2748	23.2842		2.88681		25.9617	21.772		3.99873		1.16319	2.23952			29.6368	23.2842		6.24883		25.6505	21.772		3.71453		-2.71883	0.151898			27.4972	23.2842		4.10921		25.565	21.772		3.60196		-0.549208	0.683395			25.0082	23.2842		1.62017		25.227	21.772
ABA	26.1754	23.4814	23.3882	2.78744		26.1707	21.9627	21.9627	4.2077	4.04958	1.26256	2.39921		ABA	29.8341	23.4814	23.3882	6.44608		24.8051	21.9627	21.9627	2.86911	3.53359	-2.91608	0.132487		ABA	27.2685	23.4814	23.3882	3.88047		25.3759	21.9627	21.9627	3.41295	3.55983	-0.320467	0.800811		ABA	24.8524	23.4814	23.3882	1.46438		25.3696	21.9627
	26.0796	23.3989		2.69159		25.9053	21.7738		3.94231		1.35841	2.56402			29.5591	23.3989		6.17106		25.9531	21.7738		4.01713		-2.64106	0.160311			27.1831	23.3989		3.7951		25.6276	21.7738		3.66459		-0.235098	0.849627			24.7292	23.3989		1.34118		25.0908	21.7738
	23.9602	22.9672		0.91919							3.13081	8.75927			30.7598	22.9672		7.71883							-4.18883	0.0548322			25.952	22.9672		2.91103							0.64897	1.56805			24.4863	22.9672		1.44535
PEG	25.6154	23.0287	23.0407	2.57442							1.47558	2.78095		PEG	32.2512	23.0287	23.0407	9.21017							-5.68017	0.0195029		PEG	25.7195	23.0287	23.0407	2.67849							0.881512	1.8423		PEG	24.8301	23.0287	23.0407	1.78906
	25.4412	23.1263		2.40018							1.64982	3.13794			32.2299	23.1263		9.18893							-5.65893	0.0197921			25.416	23.1263		2.37497							1.18503	2.27368			25.3012	23.1263		2.26015
	28.4195	25.8858		2.51452							1.53548	2.89885			27.8145	25.8858		1.90945							1.62055	3.07492			29.2773	25.8858		3.37229							0.187708	1.13895			25.5289	25.8858		-0.376142
NaCl	28.7196	25.9728	25.905	2.81458							1.23542	2.3545		NaCl	27.7956	25.9728	25.905	1.89063							1.63937	3.1153		NaCl	29.3739	25.9728	25.905	3.46886							0.0911425	1.06521		NaCl	25.7397	25.9728	25.905	-0.165303
	28.1215	25.8565		2.21649							1.83351	3.56402			27.1526	25.8565		1.24761							2.28239	4.86484			29.2164	25.8565		3.31135							0.248649	1.18809			25.9228	25.8565		0.0177943
	29.3881	23.5318		5.76807							-1.71807	0.303956			32.0505	23.5318		8.42848							-4.89848	0.0335281			30.9577	23.5318		7.33566							-3.77566	0.073015			27.951	23.5318		4.31898
Cold	28.9255	23.5592	23.6223	5.30552							-1.25552	0.418843		Cold	30.656	23.5592	23.6223	7.03401							-3.50401	0.0881431		Cold	30.6388	23.5592	23.6223	7.01685							-3.45685	0.0910722		Cold	27.9872	23.5592	23.6223	4.35522
	29.1812	23.7759		5.56116							-1.51116	0.350829			32.0307	23.7759		8.40868							-4.87868	0.0339915			31.3469	23.7759		7.72486							-4.16486	0.0557511			28.3024	23.7759		4.67042
PP2C28						CK								PP2C39						CK								PP2C40						CK								PP2C52						CK
6h	ct value	act value	act average	ΔCT value		ct value	act value	act average	ct-act average	average	-ΔΔCT value	2-ΔΔCT value		6h	ct value	act value	act average	ΔCT value		ct value	act value	act average	ct-act average	average	-ΔΔCT value	2-ΔΔCT value		6h	ct value	act value	act average	ΔCT value		ct value	act value	act average	ct-act average	average	-ΔΔCT value	2-ΔΔCT value		6h	ct value	act value	act average	ΔCT value		ct value	act value
	27.3453	24.9588		2.27533		24.0851	21.772		2.12212		-0.125325	0.916797			28.5156	24.9588		3.44565		26.1883	21.772		4.22527		0.324354	1.2521			29.0533	24.9588		3.98331		27.3236	21.772		5.3606		0.796688	1.73711			29.1163	24.9588		4.04634		25.1827	21.772
ABA	27.0492	25.1279	25.0697	1.97925		24.1783	21.9627	21.9627	2.21526	2.14542	0.170752	1.12565		ABA	28.4663	25.1279	25.0697	3.39633		25.8782	21.9627	21.9627	3.91523	3.77298	0.373672	1.29565		ABA	29.5284	25.1279	25.0697	4.45842		26.7144	21.9627	21.9627	4.75135	4.77721	0.321579	1.2497		ABA	29.3371	25.1279	25.0697	4.26706		25.9789	21.9627
	26.8212	25.1224		1.75124		24.0619	21.7738		2.09887		0.398764	1.31838			29.0355	25.1224		3.96547		25.1415	21.7738		3.17845		-0.195466	0.873291			29.3797	25.1224		4.30967		26.1827	21.7738		4.2197		0.470335	1.38543			29.8497	25.1224		4.77966		26.2357	21.7738
	27.6487	25.1557		2.47969							-0.329695	0.795705			28.3293	25.1557		3.16031							0.609689	1.52593			29.2511	25.1557		4.08213							0.697871	1.62211			30.4333	25.1557		5.26434
PEG	27.6688	25.3049	25.1691	2.49975							-0.349753	0.784719		PEG	28.3922	25.3049	25.1691	3.2232							0.5468	1.46084		PEG	29.5663	25.3049	25.1691	4.39731							0.382693	1.30377		PEG	29.6802	25.3049	25.1691	4.51117
	27.7885	25.0467		2.61948							-0.469477	0.722226			28.566	25.0467		3.39705							0.372952	1.295			29.7967	25.0467		4.62771							0.152289	1.11133			29.9486	25.0467		4.77962
	24.9028	24.2851		0.764758							1.38524	2.61216			27.9406	24.2851		3.80263							-0.03263	0.977636			28.7805	24.2851		4.64246							0.137538	1.10003			28.4298	24.2851		4.29178
NaCl	24.7861	24.1834	24.1376	0.64814							1.50186	2.83208		NaCl	27.9561	24.1834	24.1376	3.81811							-0.04811	0.967203		NaCl	29.114	24.1834	24.1376	4.97596							-0.195958	0.872993		NaCl	28.5315	24.1834	24.1376	4.39355
	25.0794	23.9444		0.941363							1.20864	2.31119			28.0177	23.9444		3.87967							-0.109673	0.926798			29.1704	23.9444		5.03238							-0.252378	0.839512			28.8925	23.9444		4.75452
	25.6958	24.5568		1.06576							1.08424	2.12026			30.0228	24.5568		5.39285							-1.62285	0.324694			29.701	24.5568		5.07103							-0.291035	0.817316			27.9251	24.5568		3.29508
Cold	26.6888	24.6138	24.6299	2.05877							0.0912316	1.06528		Cold	30.0464	24.6138	24.6299	5.41642							-1.64642	0.319431		Cold	29.5848	24.6138	24.6299	4.95481							-0.174806	0.885887		Cold	27.9646	24.6138	24.6299	3.33464
	25.8984	24.7192		1.26842							0.881578	1.84239			27.5464	24.7192		2.9164							0.853604	1.80701			29.1137	24.7192		4.48371							0.296288	1.22798			27.9451	24.7192		3.31508
12h	ct value	act value	act average	ΔCT value		ct value	act value	act average	ct-act average	average	-ΔΔCT value	2-ΔΔCT value		12h	ct value	act value	act average	ΔCT value		ct value	act value	act average	ct-act average	average	-ΔΔCT value	2-ΔΔCT value		12h	ct value	act value	act average	ΔCT value		ct value	act value	act average	ct-act average	average	-ΔΔCT value	2-ΔΔCT value		12h	ct value	act value	act average	ΔCT value		ct value	act value
	26.9125	25.9368		1.28055		24.0851	21.772		2.12212		0.86945	1.82697			28.2875	25.9368		2.65547		26.1883	21.772		4.22527		1.11453	2.16524			29.072	25.9368		3.43996		27.3236	21.772		5.3606		1.34004	2.53159			30.467	25.9368		4.83503		25.1827	21.772
ABA	26.5759	25.6263	25.6319	0.943876		24.1783	21.9627	21.9627	2.21526	2.14542	1.20612	2.30717		ABA	29.0468	25.6263	25.6319	3.41484		25.8782	21.9627	21.9627	3.91523	3.77298	0.355157	1.27913		ABA	28.7325	25.6263	25.6319	3.10054		26.7144	21.9627	21.9627	4.75135	4.77721	1.67946	3.20308		ABA	30.4113	25.6263	25.6319	4.77925		25.9789	21.9627
	26.8487	25.3328		1.21667		24.0619	21.7738		2.09887		0.933327	1.90968			28.5628	25.3328		2.93076		25.1415	21.7738		3.17845		0.839243	1.78911			30.3009	25.3328		4.66891		26.1827	21.7738		4.2197		0.111085	1.08004			30.2604	25.3328		4.62837		26.2357	21.7738
	26.3762	23.9868		2.33216							-0.182163	0.88138			26.8361	23.9868		2.79211							0.977891	1.96958			27.3614	23.9868		3.31743							1.46257	2.75598			28.6698	23.9868		4.62578
PEG	26.4614	24.0565	24.044	2.41744							-0.267441	0.830792		PEG	26.9366	24.0565	24.044	2.89256							0.877445	1.83712		PEG	27.4119	24.0565	24.044	3.36788							1.41212	2.66128		PEG	28.6292	24.0565	24.044	4.58518
	26.6269	24.0886		2.58288							-0.432877	0.740783			26.8455	24.0886		2.80151							0.968493	1.9568			27.6661	24.0886		3.62212							1.15788	2.2313			28.7272	24.0886		4.68317
	26.7351	26.7125		0.0421112							2.10789	4.3106			30.5642	26.7125		3.87119							-0.101194	0.932261			30.6245	26.7125		3.9315							0.8485	1.80063			31.4899	26.7125		4.79692
NaCl	26.8514	26.7402	26.6926	0.158435							1.99157	3.97668		NaCl	30.9893	26.7402	26.6926	4.29631							-0.526313	0.694327		NaCl	31.4537	26.7402	26.6926	4.76068							0.01932	1.01348		NaCl	31.8462	26.7402	26.6926	5.15315
	27.1544	26.6252		0.461446							1.68855	3.22334			31.3692	26.6252		4.67616							-0.906158	0.533604			30.6363	26.6252		3.94328							0.836718	1.78598			31.6695	26.6252		4.97654
	26.3365	25.6409		0.4465							1.7035	3.2569			29.4973	25.6409		3.60732							0.162678	1.11936			31.029	25.6409		5.139							-0.358996	0.779707			29.1956	25.6409		3.30556
Cold	26.535	25.9192	25.8895	0.645004							1.505	2.83824		Cold	30.2732	25.9192	25.8895	4.38318							-0.613184	0.653752		Cold	30.5485	25.9192	25.8895	4.65854							0.121458	1.08783		Cold	29.8277	25.9192	25.8895	3.93769
	26.8786	26.1085		0.988605							1.1614	2.23674			30.0751	26.1085		4.18512							-0.415125	0.749955			30.2883	26.1085		4.39832							0.381681	1.30286			29.6733	26.1085		3.78328
24h	ct value	act value	act average	ΔCT value		ct value	act value	act average	ct-act average	average	-ΔΔCT value	2-ΔΔCT value		24h	ct value	act value	act average	ΔCT value		ct value	act value	act average	ct-act average	average	-ΔΔCT value	2-ΔΔCT value		24h	ct value	act value	act average	ΔCT value		ct value	act value	act average	ct-act average	average	-ΔΔCT value	2-ΔΔCT value		24h	ct value	act value	act average	ΔCT value		ct value	act value
	26.3519	23.2842		2.96385		24.0851	21.772		2.12212		-0.813851	0.568862			25.9804	23.2842		2.59245		26.1883	21.772		4.22527		1.17755	2.26193			27.2563	23.2842		3.86833		27.3236	21.772		5.3606		0.911673	1.88123			28.4851	23.2842		5.09712		25.1827	21.772
ABA	25.6581	23.4814	23.3882	2.27006		24.1783	21.9627	21.9627	2.21526	2.14542	-0.12006	0.920149		ABA	25.9782	23.4814	23.3882	2.59018		25.8782	21.9627	21.9627	3.91523	3.77298	1.17982	2.26548		ABA	27.6172	23.4814	23.3882	4.22924		26.7144	21.9627	21.9627	4.75135	4.77721	0.550755	1.46485		ABA	28.4257	23.4814	23.3882	5.03766		25.9789	21.9627
	25.7692	23.3989		2.38119		24.0619	21.7738		2.09887		-0.231192	0.851931			25.9821	23.3989		2.59414		25.1415	21.7738		3.17845		1.17586	2.25928			27.5463	23.3989		4.15834		26.1827	21.7738		4.2197		0.621661	1.53865			28.3841	23.3989		4.99615		26.2357	21.7738
	25.3962	22.9672		2.35516							-0.205164	0.86744			25.6707	22.9672		2.62975							1.14025	2.2042			27.2815	22.9672		4.24054							0.539464	1.45343			28.6242	22.9672		5.5832
PEG	24.9102	23.0287	23.0407	1.86915							0.280846	1.21491		PEG	25.6776	23.0287	23.0407	2.63663							1.13337	2.1937		PEG	27.3726	23.0287	23.0407	4.33157							0.44843	1.36455		PEG	28.0141	23.0287	23.0407	4.97311
	25.0644	23.1263		2.02339							0.126614	1.09173			25.9006	23.1263		2.8596							0.9104	1.87957			27.4456	23.1263		4.40464							0.375363	1.29717			27.8976	23.1263		4.85663
	27.3384	25.8858		1.43345							0.716552	1.64325			30.1911	25.8858		4.28605							-0.516054	0.699282			29.6284	25.8858		3.72343							1.05657	2.07998			31.1931	25.8858		5.28807
NaCl	27.2669	25.9728	25.905	1.36193							0.78807	1.72676		NaCl	30.3924	25.9728	25.905	4.48742							-0.717422	0.608183		NaCl	29.853	25.9728	25.905	3.94802							0.831984	1.78013		NaCl	30.7485	25.9728	25.905	4.84346
	27.2271	25.8565		1.32206							0.827942	1.77515			30.1577	25.8565		4.25268							-0.482684	0.715645			30.1698	25.8565		4.26484							0.515156	1.42915			30.6598	25.8565		4.75478
	25.026	23.5318		1.40396							0.746043	1.67719			30.4205	23.5318		6.79852							-3.02852	0.122554			28.4568	23.5318		4.83484							-0.0548367	0.962703			28.926	23.5318		5.30402
Cold	24.9818	23.5592	23.6223	1.35982							0.790179	1.72929		Cold	28.278	23.5592	23.6223	4.65603							-0.886027	0.541102		Cold	28.5204	23.5592	23.6223	4.8984							-0.118397	0.921211		Cold	28.8127	23.5592	23.6223	5.19067
	25.5562	23.7759		1.93421							0.215794	1.16134			28.4063	23.7759		4.7843							-1.0143	0.495068			28.9261	23.7759		5.30413							-0.524134	0.695376			29.0794	23.7759		5.45737
CK	ct value	act value	act average	ΔCT value	average	-ΔΔCT value	2-ΔΔCT value
PP2C2	21.2002	21.772		-0.635803		0.475803	1.39069
PP2C2	21.2021	21.9627	21.8361	-0.633887	-0.161355	0.473887	1.38885
PP2C2	22.6216	21.7738		0.785626		-0.945626	0.519204
PP2C3	26.5237	21.772		4.68772		-0.307718	0.807919
PP2C3	25.7689	21.9627	21.8361	3.93291	4.37885	0.447089	1.36329
PP2C3	26.3519	21.7738		4.51593		-0.135934	0.91008
PP2C4	23.4736	21.772		1.63756		-0.32756	0.796883
PP2C4	22.4017	21.9627	21.8361	0.56572	1.37694	0.74428	1.67514
PP2C4	23.7635	21.7738		1.92755		-0.617548	0.651778
PP2C5	26.6208	21.772		4.78481		-0.994808	0.501803
PP2C5	25.2294	21.9627	21.8361	3.39338	3.85406	0.396617	1.31642
PP2C5	25.22	21.7738		3.384		0.406003	1.32501
PP2C15	25.9617	21.772		4.12573		0.054269	1.03833
PP2C15	26.1707	21.9627	21.8361	4.3347	4.17658	-0.154696	0.898321
PP2C15	25.9053	21.7738		4.06931		0.110687	1.07974
PP2C18	25.6505	21.772		3.81453		-0.184531	0.879935
PP2C18	24.8051	21.9627	21.8361	2.96911	3.63359	0.660887	1.58105
PP2C18	25.9531	21.7738		4.11713		-0.487135	0.713441
PP2C19	25.565	21.772		3.72896		-0.0389586	0.973357
PP2C19	25.3759	21.9627	21.8361	3.53995	3.68683	0.150052	1.10961
PP2C19	25.6276	21.7738		3.79159		-0.101595	0.932002
PP2C22	25.227	21.772		3.39096		-0.000961174	0.999334
PP2C22	25.3696	21.9627	21.8361	3.53361	3.39312	-0.143612	0.90525
PP2C22	25.0908	21.7738		3.25479		0.135212	1.09825
PP2C28	24.0851	21.772		2.24912		0.0208827	1.01458
PP2C28	24.1783	21.9627	21.8361	2.34226	2.27242	-0.0722608	0.951146
PP2C28	24.0619	21.7738		2.22587		0.0441275	1.03106
PP2C39	26.1883	21.772		4.35227		-0.45227	0.730892
PP2C39	25.8782	21.9627	21.8361	4.04223	3.89998	-0.14223	0.906118
PP2C39	25.1415	21.7738		3.30545		0.594546	1.51
PP2C40	27.3236	21.772		5.4876		-0.587595	0.665451
PP2C40	26.7144	21.9627	21.8361	4.87835	4.90421	0.0216461	1.01512
PP2C40	26.1827	21.7738		4.3467		0.553305	1.46744
PP2C52	25.1827	21.772		3.3467		0.613305	1.52976
PP2C52	25.9789	21.9627	21.8361	4.1429	3.96309	-0.182901	0.88093
PP2C52	26.2357	21.7738		4.39967		-0.439668	0.737304
[truncated: 5 more columns]

## Sheet: T1-ABA
T1	gene	CK	6H	12H	24H			CK	6H	12H	24H			ck	ck	6h	6h	12h	12h	24h	24h
		1.39069	1.14077	1.70039	1.56807		average	1.0996	0.9555	1.6407	1.4283		PP2C2	1.0996	0.29019	0.9555	0.10308	1.6407	0.03352	1.4283	0.08594
	PP2C2	1.38885	0.941112	1.63739	1.44494		SE	0.29019	0.10308	0.03352	0.08594		PP2C3	1.0271	0.17066	10.8214	2.61335	16.6198	1.07932	36.7755	1.42633
		0.519204	0.784543	1.58441	1.27178		Difference	ab	b	a	ab		PP2C4	1.0413	0.31969	1.5321	0.15448	0.9808	0.09667	0.3464	0.02119
													PP2C5	1.0477	0.27298	0.9993	0.20863	0.1888	0.02971	0.0603	0.02148
		0.807919	16.0103	16.0058	38.6392		average	1.0271	10.8214	16.6198	36.7755		PP2C15	1.0055	0.05489	6.2568	0.43328	5.6363	0.17274	2.4009	0.09368
	PP2C3	1.36329	7.68334	18.719	33.9733		SE	0.17066	2.61335	1.07932	1.42633		PP2C18	1.0009	0.05572	2.8726	0.20797	3.1236	0.46951	3.4804	0.19341
		0.91008	8.77056	15.1346	37.714		Difference	d	c	b	a		PP2C19	1.005	0.05366	5.2929	0.07322	1.3996	0.06508	0.7779	0.04933
													PP2C22	1.0009	0.05572	2.8726	0.20797	3.1236	0.46951	3.4804	0.19341
		0.796883	1.76848	0.932099	0.310109		average	1.0413	1.5321	0.9808	0.3464		PP2C28	0.9989	0.02436	0.402	0.17746	2.0146	0.14822	0.7803	0.10754
	PP2C4	1.67514	1.58625	0.843035	0.345533		SE	0.31969	0.15448	0.09667	0.02119		PP2C39	1.049	0.23598	1.1403	0.13412	1.7445	0.25677	2.2622	0.0018
		0.651778	1.24162	1.16712	0.383497		Difference	ab	a	ab	b		PP2C40	1.0493	0.23215	1.4574	0.14523	2.2716	0.32651	1.6282	0.12827
													PP2C52	1.0493	0.24377	0.7106	0.10107	0.5341	0.02318	0.4344	0.00879
		0.501803	1.38303	0.244757	0.0826567		average	1.0477	0.9993	0.1888	0.0603
	PP2C5	1.31642	0.665505	0.17815	0.0173223		SE	0.27298	0.20863	0.02971	0.02148
		1.32501	0.949478	0.143501	0.0808342		Difference	a	a	b	b
		1.03833	5.97285	5.73015	2.23952		average	1.0055	6.2568	5.6363	2.4009
	PP2C15	0.898321	5.68976	5.87729	2.39921		SE	0.05489	0.43328	0.17274	0.09368
		1.07974	7.10781	5.30141	2.56402		Difference	c	a	a	b
		0.879935	0.813594	1.34771	0.151898		average	1.0009	2.8726	3.1236	3.4804
	PP2C18	1.58105	1.00056	1.17955	0.132487		SE	0.05572	0.20797	0.46951	0.19341
		0.713441	1.42865	1.3635	0.160311		Difference	b	a	a	a
		0.973357	5.23876	1.33756	0.683395		average	1.005	5.2929	1.3996	0.7779
	PP2C19	1.10961	5.2021	1.33159	0.800811		SE	0.05366	0.07322	0.06508	0.04933
		0.932002	5.43778	1.52976	0.849627		Difference	c	a	b	d
		0.999334	2.7124	2.33965	3.13797		average	1.0009	2.8726	3.1236	3.4804
	PP2C22	0.90525	2.6202	3.06786	3.49579		SE	0.05572	0.20797	0.46951	0.19341
		1.09825	3.28508	3.9632	3.80744		Difference	b	a	a	a
		1.01458	0.916797	1.82697	0.568862		average	0.9989	0.402	2.0146	0.7803
	PP2C28	0.951146	1.12565	2.30717	0.920149		SE	0.02436	0.17746	0.14822	0.10754
		1.03106	1.31838	1.90968	0.851931		Difference	b	c	a	bc
		0.730892	1.2521	2.16524	2.26193		average	1.049	1.1403	1.7445	2.2622
	PP2C39	0.906118	1.29565	1.27913	2.26548		SE	0.23598	0.13412	0.25677	0.0018
		1.51	0.873291	1.78911	2.25928		Difference	c	bc	ab	a
		0.665451	1.73711	2.53159	1.88123		average	1.0493	1.4574	2.2716	1.6282
	PP2C40	1.01512	1.2497	3.20308	1.46485		SE	0.23215	0.14523	0.32651	0.12827
		1.46744	1.38543	1.08004	1.53865		Difference	b	ab	a	ab
		1.52976	0.866734	0.501724	0.418379		average	1.0493	0.7106	0.5341	0.4344
	PP2C52	0.88093	0.743775	0.521504	0.43598		SE	0.24377	0.10107	0.02318	0.00879
		0.737304	0.521357	0.578999	0.448709		Difference	a	ab	c	c

## Sheet: T2-PEG
T2	gene	CK	6H	12H	24H			CK	6H	12H	24H			ck	ck	6h	6h	12h	12h	24h	24h
		1.39069	0.480325	0.325781	0.400707		average	1.0996	0.3907	0.5859	0.4339		PP2C2	1.0996	0.29019	0.3907	0.04503	0.5859	0.21588	0.4339	0.02217
	PP2C2	1.38885	0.353695	1.01435	0.475926		SE	0.29019	0.04503	0.21588	0.02217		PP2C3	1.0271	0.17066	5.4899	0.0688	8.3133	1.07175	12.4741	0.12362
		0.519204	0.338109	0.417423	0.424934		Difference	a	b	ab	b		PP2C4	1.0413	0.31969	0.7394	0.01073	0.7097	0.02328	0.6602	0.02418
													PP2C5	1.0477	0.27298	0.705	0.04556	0.5931	0.13015	0.3013	0.06281
		0.807919	5.44567	4.97014	12.3162		average	1.0271	5.4899	8.3133	12.4741		PP2C15	1.0055	0.05489	3.1166	0.169	8.7965	0.56832	4.8927	0.33602
	PP2C3	1.36329	5.39909	9.94445	12.3882		SE	0.17066	0.0688	1.07175	0.12362		PP2C18	1.0581	0.26584	0.1284	0.04437	0.0649	0.01565	0.0314	0.01173
		0.91008	5.62479	10.0254	12.7178		Difference	d	c	b	a		PP2C19	1.005	0.05366	2.0826	0.1704	2.1803	0.21319	1.8947	0.20537
													PP2C22	1.0009	0.05572	1.2652	0.03963	3.625	0.82195	2.7824	0.44127
		0.796883	0.718818	0.675332	0.654974		average	1.0413	0.7394	0.7097	0.6602		PP2C28	0.9989	0.02436	0.7676	0.02288	0.8177	0.04112	1.058	0.10171
	PP2C4	1.67514	0.755022	0.754075	0.621159		SE	0.31969	0.01073	0.02328	0.02418		PP2C39	1.049	0.23598	1.4273	0.06875	1.9212	0.04219	2.0925	0.1065
		0.651778	0.744267	0.699696	0.704435		Difference	a	a	ab	a		PP2C40	1.0493	0.23215	1.3457	0.14893	2.5495	0.16144	1.3717	0.04525
													PP2C52	1.0493	0.24377	0.5073	0.07406	0.578	0.01135	0.4163	0.05983
		0.501803	0.61933	0.573283	0.406498		average	1.0477	0.705	0.5931	0.3013
	PP2C5	1.31642	0.774729	0.827781	0.189244		SE	0.27298	0.04556	0.13015	0.06281
		1.32501	0.720865	0.378227	0.308068		Difference	a	ab	ab	b
		1.03833	2.88204	7.3719	8.75927		average	1.0055	3.1166	8.7965	4.8927
	PP2C15	0.898321	3.44465	10.8879	2.78095		SE	0.05489	0.169	0.56832	0.33602
		1.07974	3.02321	8.12974	3.13794		Difference	c	bc	a	b
		0.879935	0.187489	0.0352719	0.0548322		average	1.0581	0.1284	0.0649	0.0314
	PP2C18	1.58105	0.0415282	0.0884498	0.0195029		SE	0.26584	0.04437	0.01565	0.01173
		0.713441	0.15621	0.0709344	0.0197921		Difference	a	b	b	b
		0.973357	2.26529	2.5996	1.56805		average	1.005	2.0826	2.1803	1.8947
	PP2C19	1.10961	2.24036	1.90373	1.8423		SE	0.05366	0.1704	0.21319	0.20537
		0.932002	1.74206	2.03749	2.27368		Difference	b	a	a	a
		0.999334	1.30012	3.35907	3.54221		average	1.0009	1.2652	3.625	2.7824
	PP2C22	0.90525	1.30934	5.16292	2.7913		SE	0.05572	0.03963	0.82195	0.44127
		1.09825	1.18611	2.35312	2.0137		Difference	c	bc	a	ab
		1.01458	0.795705	0.88138	0.86744		average	0.9989	0.7676	0.8177	1.058
	PP2C28	0.951146	0.784719	0.830792	1.21491		SE	0.02436	0.02288	0.04112	0.10171
		1.03106	0.722226	0.740783	1.09173		Difference	ab	c	bc	a
		0.730892	1.52593	1.96958	2.2042		average	1.049	1.4273	1.9212	2.0925
	PP2C39	0.906118	1.46084	1.83712	2.1937		SE	0.23598	0.06875	0.04219	0.1065
		1.51	1.295	1.9568	1.87957		Difference	b	b	a	a
		0.665451	1.62211	2.75598	1.45343		average	1.0493	1.3457	2.5495	1.3717
	PP2C40	1.01512	1.30377	2.66128	1.36455		SE	0.23215	0.14893	0.16144	0.04525
		1.46744	1.11133	2.2313	1.29717		Difference	b	b	a	b
		1.52976	0.372589	0.58004	0.298707		average	1.0493	0.5073	0.578	0.4163
	PP2C52	0.88093	0.627996	0.596594	0.455932		SE	0.24377	0.07406	0.01135	0.05983
		0.737304	0.521369	0.557419	0.494269		Difference	a	b	b	b

## Sheet: T3-NaCl
T3	gene	CK	6H	12H	24H			CK	6H	12H	24H			ck	ck	6h	6h	12h	12h	24h	24h
		1.39069	3.10743	1.2678	0.557079		average	1.0996	3.4718	1.1721	0.6428		PP2C2	1.0996	0.29019	3.4718	0.29756	1.1721	0.11768	0.6428	0.04611
	PP2C2	1.38885	4.06149	1.31038	0.715131		SE	0.29019	0.29756	0.11768	0.04611		PP2C3	1.0271	0.17066	27.5016	0.50756	19.4629	0.8369	17.0283	0.85361
		0.519204	3.24653	0.937986	0.65611		Difference	b	a	b	b		PP2C4	1.0413	0.31969	1.5579	0.13769	0.4846	0.20089	0.4144	0.03163
													PP2C5	1.0477	0.27298	0.1257	0.00839	0.1714	0.03789	0.1755	0.03114
		0.807919	26.7484	18.6281	15.4558		average	1.0271	27.5016	19.4629	17.0283		PP2C15	1.0055	0.05489	6.4555	0.21956	4.1341	0.31254	2.9391	0.34974
	PP2C3	1.36329	27.2889	21.1367	18.3902		SE	0.17066	0.50756	0.8369	0.85361		PP2C18	1.0581	0.26584	1.5253	0.08508	4.143	0.33082	3.685	0.29002
		0.91008	28.4676	18.6239	17.2388		Difference	d	a	b	c		PP2C19	1.005	0.05366	2.7788	0.0278	1.5916	0.16889	1.1308	0.03571
													PP2C22	1.0009	0.05572	2.6007	0.4082	3.8032	0.24396	10.9552	0.86634
		0.796883	1.34292	0.451603	0.385974		average	1.0413	1.5579	0.4846	0.4144		PP2C28	0.9989	0.02436	2.5851	0.15097	3.8369	0.32156	1.7151	0.03852
	PP2C4	1.67514	1.81444	0.15437	0.477599		SE	0.31969	0.13769	0.20089	0.03163		PP2C39	1.049	0.23598	0.9572	0.0155	0.7201	0.1158	0.6744	0.03343
		0.651778	1.51649	0.847904	0.379761		Difference	ab	a	b	b		PP2C40	1.0493	0.23215	0.9375	0.08183	1.5334	0.25998	1.7631	0.18807
													PP2C52	1.0493	0.24377	0.6477	0.06031	0.4575	0.03256	0.4652	0.0502
		0.501803	0.134062	0.245752	0.118826		average	1.0477	0.1257	0.1714	0.1755
	PP2C5	1.31642	0.134062	0.121516	0.18143		SE	0.27298	0.00839	0.03789	0.03114
		1.32501	0.108892	0.146987	0.226198		Difference	a	b	b	b
		1.03833	6.09769	3.55138	2.89885		average	1.0055	6.4555	4.1341	2.9391
	PP2C15	0.898321	6.41394	3.69512	2.3545		SE	0.05489	0.21956	0.31254	0.34974
		1.07974	6.85487	5.15582	3.56402		Difference	d	a	b	c
		0.879935	1.67297	3.51688	3.07492		average	1.0581	1.5253	4.143	3.685
	PP2C18	1.58105	1.37823	4.64128	3.1153		SE	0.26584	0.08508	0.33082	0.29002
		0.713441	1.52477	4.27085	4.86484		Difference	b	b	a	a
		0.973357	2.72333	1.76103	1.13895		average	1.005	2.7788	1.5916	1.1308
	PP2C19	1.10961	2.80365	1.25386	1.06521		SE	0.05366	0.0278	0.16889	0.03571
		0.932002	2.8095	1.76001	1.18809		Difference	c	a	b	c
		0.999334	3.41399	3.31536	12.5198		average	1.0009	2.6007	3.8032	10.9552
	PP2C22	0.90525	2.13262	4.05389	10.8176		SE	0.05572	0.4082	0.24396	0.86634
		1.09825	2.25543	4.04041	9.52821		Difference	c	bc	b	a
		1.01458	2.61216	4.3106	1.64325		average	0.9989	2.5851	3.8369	1.7151
	PP2C28	0.951146	2.83208	3.97668	1.72676		SE	0.02436	0.15097	0.32156	0.03852
		1.03106	2.31119	3.22334	1.77515		Difference	d	b	a	c
		0.730892	0.977636	0.932261	0.699282		average	1.049	0.9572	0.7201	0.6744
	PP2C39	0.906118	0.967203	0.694327	0.608183		SE	0.23598	0.0155	0.1158	0.03343
		1.51	0.926798	0.533604	0.715645		Difference	a	a	a	a
		0.665451	1.10003	1.80063	2.07998		average	1.0493	0.9375	1.5334	1.7631
	PP2C40	1.01512	0.872993	1.01348	1.78013		SE	0.23215	0.08183	0.25998	0.18807
		1.46744	0.839512	1.78598	1.42915		Difference	b	b	ab	a
		1.52976	0.731142	0.515155	0.366512		average	1.0493	0.6477	0.4575	0.4652
	PP2C52	0.88093	0.681343	0.402441	0.498804		SE	0.24377	0.06031	0.03256	0.0502
		0.737304	0.530522	0.454849	0.530425		Difference	a	ab	b	b

## Sheet: T4-Cold
T4	gene	CK	6H	12H	24H			CK	6H	12H	24H			ck	ck	6h	6h	12h	12h	24h	24h
		1.39069	0.277449	0.0762409	0.0302492		average	1.0996	0.1736	0.3406	0.0977		PP2C2	1.0996	0.29019	0.1736	0.05197	0.3406	0.18577	0.0977	0.0658
	PP2C2	1.38885	0.125795	0.246565	0.0335291		SE	0.29019	0.05197	0.18577	0.0658		PP2C3	1.0271	0.17066	3.5816	0.28293	2.0117	0.191	0.7779	0.04274
		0.519204	0.117617	0.698853	0.229263		Difference	a	b	b	b		PP2C4	1.0413	0.31969	2.1219	0.02886	0.6091	0.0793	0.242	0.01357
													PP2C5	1.0477	0.27298	2.902	0.34935	2.4289	0.25723	1.7656	0.22656
		0.807919	4.0893	2.2887	0.857953		average	1.0271	3.5816	2.0117	0.7779		PP2C15	1.0055	0.05489	1.9575	0.13134	0.9139	0.16451	0.3579	0.03335
	PP2C3	1.36329	4.97251	2.10098	0.763955		SE	0.17066	0.28293	0.191	0.04274		PP2C18	1.0581	0.26584	2.5502	0.63464	0.9878	0.21759	0.0519	0.01813
		0.91008	1.68305	1.64538	0.711899		Difference	b	a	ab	b		PP2C19	1.005	0.05366	2.7615	0.14655	1.4111	0.02358	0.0733	0.0102
													PP2C22	1.0009	0.05572	2.3893	0.28224	0.9562	0.0384	0.4445	0.03301
		0.796883	2.13486	0.595538	0.222433		average	1.0413	2.1219	0.6091	0.242		PP2C28	0.9989	0.02436	1.676	0.31571	2.7773	0.29607	1.5226	0.18126
	PP2C4	1.67514	2.06676	0.47911	0.235525		SE	0.31969	0.02886	0.0793	0.01357		PP2C39	1.049	0.23598	0.817	0.19498	0.841	0.14191	0.5088	0.01621
		0.651778	2.16422	0.752796	0.268092		Difference	b	a	bc	c		PP2C40	1.0493	0.23215	0.9771	0.12701	1.0568	0.15182	0.8598	0.08306
													PP2C52	1.0493	0.24377	1.4391	0.01139	1.141	0.15668	0.3602	0.01914
		0.501803	3.5652	2.30698	1.55992		average	1.0477	2.902	2.4289	1.7656
	PP2C5	1.31642	1.81176	2.92274	2.2181		SE	0.27298	0.34935	0.25723	0.22656
		1.32501	3.32894	2.05707	1.51879		Difference	b	a	a	ab
		1.03833	2.01674	1.07032	0.303956		average	1.0055	1.9575	0.9139	0.3579
	PP2C15	0.898321	1.70619	1.08632	0.418843		SE	0.05489	0.13134	0.16451	0.03335
		1.07974	2.14944	0.584978	0.350829		Difference	b	a	b	c
		0.879935	3.60126	0.789121	0.0335281		average	1.0581	2.5502	0.9878	0.0519
	PP2C18	1.58105	2.64093	0.751746	0.0881431		SE	0.26584	0.63464	0.21759	0.01813
		0.713441	1.40842	1.42239	0.0339915		Difference	b	a	b	b
		0.973357	2.85511	1.36408	0.073015		average	1.005	2.7615	1.4111	0.0733
	PP2C19	1.10961	2.95518	1.43806	0.0910722		SE	0.05366	0.14655	0.02358	0.0102
		0.932002	2.47411	1.43107	0.0557511		Difference	c	a	b	d
		0.999334	2.71303	0.991644	0.483311		average	1.0009	2.3893	0.9562	0.4445
	PP2C22	0.90525	2.62786	0.997565	0.471321		SE	0.05572	0.28224	0.0384	0.03301
		1.09825	1.82694	0.87952	0.378818		Difference	b	a	b	c
		1.01458	2.12026	3.2569	1.67719		average	0.9989	1.676	2.7773	1.5226
	PP2C28	0.951146	1.06528	2.83824	1.72929		SE	0.02436	0.31571	0.29607	0.18126
		1.03106	1.84239	2.23674	1.16134		Difference	b	b	a	b
		0.730892	0.324694	1.11936	0.490214		average	1.049	0.817	0.841	0.5088
	PP2C39	0.906118	0.319431	0.653752	0.541102		SE	0.23598	0.19498	0.14191	0.01621
		1.51	1.80701	0.749955	0.495068		Difference	a	a	a	a
		0.665451	0.817316	0.779707	0.962703		average	1.0493	0.9771	1.0568	0.8598
	PP2C40	1.01512	0.885887	1.08783	0.921211		SE	0.23215	0.12701	0.15182	0.08306
		1.46744	1.22798	1.30286	0.695376		Difference	a	a	a	a
		1.52976	1.45894	1.44838	0.362483		average	1.0493	1.4391	1.141	0.3602
	PP2C52	0.88093	1.41948	0.934527	0.392111		SE	0.24377	0.01139	0.15668	0.01914
		0.737304	1.43886	1.0401	0.32593		Difference	a	a	a	b
